# Supplementary material
Source: Research Square preprint supplement (doi:10.21203/rs.3.rs-9935025/v1)
Supplement: Supplementary file 3 [file 8bdda5732256e21ad45be355.docx]

# Supplementary Table.1 Data sources included in the study

This table lists the original data sources included in the filtered dataset used in this study. Source ID corresponds to the identifier assigned in the RivFishTIME database (Comte et al., 2021). Country indicates the country from which the corresponding time series were derived, and N indicates the number of sites contributed by each source. Full bibliographic references or source descriptions are provided as reported for each dataset.

| Source ID | Country | N | Reference |
| --- | --- | --- | --- |
| 3 | COL | 2 | Universidad de Antioquia-Empresas Publicas de Medellin. (2019) Monitoreo a la ictiofauna, su habitat y sus servicios ecosistemicos. Convenio CT 2017- 001714. |
| 4 | HUN | 50 | Erős, T., Sály, P., Takács, P., Higgins, C. L., Bíró, P., & Schmera, D. (2014). Quantifying temporal variability in the metacommunity structure of stream fishes: the influence of non-native species and environmental drivers. Hydrobiologia, 722(1), 31-43.  Feng, K., Takács, P., Czeglédi, I., & Erős, T. (2024). Patterns and drivers in the functional diversity decomposition of invaded stream fish communities. Diversity and Distributions, 30(12), e13914. |
| 5 | USA | 8 | Gammon, J. (2003) The fish communities of Big Raccoon Creek 1981-2002. Report for Heritage Environmental Services. Indianapolis, Indiana. 258 pages. |
| 6 | AUS | 120 | Bunn, S.E., Abal, E.G., Smith, M.J., Choy, S.C., Fellows, C.S., Harch, B.D., Kennard, M.J. & Sheldon, F. (2010) Integration of science and monitoring of river ecosystem health to guide investments in catchment protection and rehabilitation. Freshwater Biology, 55, 223–240. |
| 7 | FIN | 87 | Finnish electrofishing register Hertta (2019) Available at https://wwwp2.ymparisto.fi/koekalastus_sahko/yhteinen/Login.aspx?ReturnUrl=%2fkoekalastus_sahko [Accessed on 04/09/2019] |
| 8 | CAN | 1 | Sigouin, D. (2017) Fish Communities – Forillon, dataset fe2441a6-8ae4-4884-b181-cd7ec53bd842. Available at https://open.canada.ca/data/en/dataset/fe2441a6-8ae4-4884-b181-cd7ec53bd842 [Accessed on 05/07/2019]. |
| 9 | USA | 3 | Whitney, J.E., Gido, K.E., Martin, E.C. & Hase K.J. (2016) The first to arrive and the last to leave: colonisation and extinction dynamics of common and rare fishes in intermittent prairie streams. Freshwater Biology, 61, 1321–1334. |
| 10 | USA | 6 | Gido, K.B, Propst, D.L., Olden, J.D., & Bestgen, K.R. (2013) Multidecadal responses of native and introduced fishes to natural and altered flow regimes in the American Southwest. Canadian Journal Fisheries and Aquatic Sciences, 70, 554–564.  Gido, K.B, Propst, D.L., Whitney, J.E., Hedden, S.C., Turner, T.F. & Pilger, T.J. (2019) Pockets of resistance: Response of arid-land fish communities to climate, hydrology, and wildfire. Freshwater Biology, 64, 761–777. |
| 11 | USA | 6 | Kesner, B.R. & Marsh, P.C. (2010) Central Arizona project fish monitoring: Final report. Analysis of fish population monitoring data for selected waters of the Gila River Basin, Arizona, for the five year period 2005-2009. Contract No. R09PD32013. Submitted to U.S. Bureau of Reclamation. Tempe, Arizona: Marsh and Associates, LLC. 50 pages. |
| 14 | JPN | 25 | Terui, A., Ishiyama, N., Urabe, H., Ono, S., Finlay, J. C., & Nakamura, F. (2018). Metapopulation stability in branching river networks. Proceedings of the National Academy of Sciences, 115(26), E5963-E5969. |
| 15 | USA | 5 | Iowa DNR [Department of Natural Resources] (2013) BioNet - Iowa DNR Biological Monitoring and Assessment Database. Available at https://programs.iowadnr.gov/bionet/ [Accessed on 02/01/2018]. |
| 17 | CIV | 4 | Levêque, C., Hougard, J.M., Resh, V., Statzner, B. & Yaméogo, L. (2003) Freshwater ecology and biodiversity in the tropics: what did we learn from 30 years of onchocerciasis control and the associated biomonitoring of West African rivers? Hydrobiologia, 500, 23–49. |
| 18 | USA | 3 | Pyron, M., Vaughn, C.C., Winston, M.R. & Pigg J. (1998) Fish assemblage structure from 20 years of collections in the Kiamichi River, Oklahoma. Southwestern Naturalist, 43, 336–343. |
| 19 | USA | 4 | Gido K. (2017). Gido, K. (2017) CFC01 Kings Creek long-term fish and crayfish community sampling at Konza Prairie. Environmental Data Initiative. Available at https://doi.org/10.6073/pasta/150e218b069074a8ecede85a7406d43f [Accessed on 11/18/2019]. |
| 20 | USA | 15 | McLarney, W.O., Meador, J. & Chamblee, J. (2013) Upper Little Tennessee River biomonitoring program database. Coweeta Long Term Ecological Research Program. Available at: https://coweeta.uga.edu/dbpublic/dataset_details.asp?accession54045 [Accessed on 11/15/2019]. |
| 21 | USA | 62 | Long Term Resource Monitoring Program (2016) Available at https://www.umesc.usgs.gov/data_library/fisheries/fish1_query.shtml [Accessed on 06/09/2019]. |
| 22 | USA | 1 | Matthews, W.J. & Marsh-Matthews, E. (2017) Data from: Stream fish community dynamics: a critical synthesis, Dryad, Dataset, doi: 10.5061/dryad.2435k. |
| 24 | USA | 1 | Minnesota Pollution Control Agency (2018) Surface water data. Available at https://cf.pca.state.mn.us/water/watershedweb/wdip/search_more.cfm?datatype=assessments [Accessed on 04/03/2019]. |
| 25 | USA | 16 | Montana, Fish, Wildlife & Parks (2019) Fish Survey Sites. Available at http://gis-mtfwp.opendata.arcgis.com/datasets/8192e75218c6460ba97ba3dd0a2fb3a5 [Accessed on 05/21/2019]. |
| 26 | USA | 31 | U.S. Geological Survey (2019) BioData - Aquatic Bioassessment Data for the Nation. Available at https://aquatic.biodata.usgs.gov/clearCriteria.action [Accessed on 10/15/2019], doi:10.5066/F77W698B. |
| 27 | GBR | 1022 | U.K. Environmental Agency (2019) National Fish Populations Database (NFPD): Freshwater fish survey relational datasets. Available at https://data.gov.uk/dataset/d129b21c-9e59-4913-91d2-82faef1862dd/nfpdfreshwater-fish-survey-relational-datasets [Accessed on 10/15/2019]. |
| 30 | USA | 22 | Winston, M.R., Taylor, C.M. & Pigg, J. (1991) Upstream extirpation of four minnow species due to damming of a prairie stream. Transactions of the American Fisheries Society, 120, 98–105. |
| 31 | BWA | 1 | Mosie, I. & Makati, K. (2018) Long term time-series data on fish monitoring by Okavango Research Institute, Botswana. Version 1.2. Okavango Research Institute. Available at https://www.gbif.org/dataset/77929c0a-7506-4b2d-a49d-10fc3312d50d [Accessed on 05/11/2019], doi: 10.15468/4vvwzc. |
| 32 | FRA | 653 | Office français de la biodiversité (2019) Suivi des éléments biologiques ‘POISSONS’ des rivières françaises. Available at http://www.naiades.eaufrance.fr/acces-donnees#/hydrobiologie [Accessed on 07/08/2019]. |
| 32 | BEL | 2 | Office français de la biodiversité (2019) Suivi des éléments biologiques ‘POISSONS’ des rivières françaises. Available at http://www.naiades.eaufrance.fr/acces-donnees#/hydrobiologie [Accessed on 07/08/2019]. |
| 34 | ESP | 94 | Agencia Vasca del Agua (2019) UBEGI. Información sobre el estado de las masas de agua de la CAPV. Available at http://www.uragentzia.euskadi.eus/informacion/ubegi/u81-0003341/es/ [Accessed 10/10/2019]. |
| 35 | BRA | 3 | Ortega, J.C.G., Dias, R.M., Petry, A.C., Oliveira, E.F. & Agostinho, A.A. (2015) Spatio-temporal organization patterns in the fish assemblages of a Neotropical floodplain. Hydrobiologia, 745, 31–41. |
| 36 | USA | 15 | Davenport, S. R. (Unpublished data). |
| 38 | USA | 3 | Bêche, L.A., Connors, P.G., Resh, V.H. & Merenlender, A.M. (2009) Resilience of fishes and invertebrates to prolonged drought in two California streams. Ecography, 32, 778–788.  The Resh Lab (2019) Hunting Creek and Knoxville Creek long-term data. Available at: https://nature.berkeley.edu/reshlab/data/HCKC_fish.xls [Accessed 05/19/2019]. |
| 39 | CAN | 5 | Toronto and Region Conservation Authority (TRCA) (2018) Watershed Fish Community. Available at https://data.trca.ca/dataset/2018-watershed-fish-community [Accessed on 09/18/2019]. |
| 40 | USA | 3 | U.S. Fish and Wildlife Service (2017) San Juan River basin recovery implementation program. Albuquerque, NM, 87113, USA. Data are available by contacting: https://www.fws.gov/southwest/sjrip/. |
| 41 | USA | 7 | Stefferud, J.A. (Unpublished data). |
| 42 | SWE | 1386 | Sers, B. (2013) Swedish Electrofishing RegiSter – SERS. Swedish University of Agricultural Sciences (SLU), Department of Aquatic Resources. Available at http://www.slu.se/elfiskeregistret [Accessed on 11/18/2019]. |
| 42 | FIN | 11 | Sers, B. (2013) Swedish Electrofishing RegiSter – SERS. Swedish University of Agricultural Sciences (SLU), Department of Aquatic Resources. Available at http://www.slu.se/elfiskeregistret [Accessed on 11/18/2019]. |
| 42 | NOR | 1 | Sers, B. (2013) Swedish Electrofishing RegiSter – SERS. Swedish University of Agricultural Sciences (SLU), Department of Aquatic Resources. Available at http://www.slu.se/elfiskeregistret [Accessed on 11/18/2019]. |
| 43 | ESP | 10 | Benejam, L., Angermeier, P.L., Munné, A. & García-Berthou, E. (2010) Assessing effects of water abstraction on fish assemblages in Mediterranean streams. Freshwater Biology 55, 628–642. |
| 45 | USA | 7 | Rinne, J.N., & Miller, D. (2006) Hydrology, geomorphology and management: implications for sustainability of native southwestern fishes. Reviews in Fisheries Sciences 14, 91–110. |

# Supplementary Table.2 Summary of sampling design, data structure, and geographical distribution of the RivFishTIME dataset after filtering.

This table summarizes key characteristics of the filtered dataset used in the analyses, including spatial distribution, sampling protocols, abundance units, and biogeographic structure.

“Site location (Country, Realm)” reports the number and proportion of time series contributed by each country within major biogeographic realms. Sampling sites were predominantly located in the Palearctic, Nearctic, and Australasia, with four countries (Sweden, United Kingdom, France, and the United States) contributing the majority of time series.

“Protocol” indicates the sampling method used to collect fish community data, with electrofishing accounting for the vast majority of observations.

“Abundance unit” describes how fish abundance was quantified within each time series, including standardized density measures (individuals per 100 m²), raw counts, and effort-standardized metrics (CPUE).

“Palearctic subregion” reports the subdivision of Palearctic sites into four major freshwater ecoregion groupings used for finer-scale analyses: Northern Baltic Drainages, Great Britain, Central & Western Europe, and Cantabric Coast–Languedoc. These groupings correspond to freshwater ecoregions, except that Great Britain was treated as a separate unit due to its distinct sampling density and analytical importance.

Values represent the number of time series (N) and their percentage contribution (%) relative to the total dataset (n = 3,695 time series).

| Method | Value | N | Percent |
| --- | --- | --- | --- |
| Site location (Country, Realm) | (SWE, Palearctic) | 1386 | 37.51 |
| Site location (Country, Realm) | (GBR, Palearctic) | 1022 | 27.66 |
| Site location (Country, Realm) | (FRA, Palearctic) | 653 | 17.67 |
| Site location (Country, Realm) | (USA, Nearctic) | 218 | 5.9 |
| Site location (Country, Realm) | (AUS, Australasia) | 120 | 3.25 |
| Site location (Country, Realm) | (ESP, Palearctic) | 104 | 2.81 |
| Site location (Country, Realm) | (FIN, Palearctic) | 98 | 2.65 |
| Site location (Country, Realm) | (HUN, Palearctic) | 50 | 1.35 |
| Site location (Country, Realm) | (JPN, Palearctic) | 25 | 0.68 |
| Site location (Country, Realm) | (CAN, Nearctic) | 6 | 0.16 |
| Site location (Country, Realm) | (CIV, Afrotropics) | 4 | 0.11 |
| Site location (Country, Realm) | (BRA, Neotropics) | 3 | 0.08 |
| Site location (Country, Realm) | (BEL, Palearctic) | 2 | 0.05 |
| Site location (Country, Realm) | (COL, Neotropics) | 2 | 0.05 |
| Site location (Country, Realm) | (BWA, Afrotropics) | 1 | 0.03 |
| Site location (Country, Realm) | (NOR, Palearctic) | 1 | 0.03 |
| Protocol | Electrofishing | 3614 | 97.81 |
| Protocol | Seining / Netting | 47 | 1.27 |
| Protocol | Trapping | 29 | 0.78 |
| Protocol | Trawling | 5 | 0.14 |
| Abundance unit | Individual numbers per 100m2 | 2628 | 71.12 |
| Abundance unit | Count | 1035 | 28.01 |
| Abundance unit | Catch Per Unit Effort (CPUE) | 29 | 0.78 |
| Abundance unit | Leslie index | 3 | 0.08 |
| Palearctic subregion | Northern Baltic Drainages | 1485 | 44.45 |
| Palearctic subregion | Great Britain | 1022 | 30.59 |
| Palearctic subregion | Central & Western Europe | 443 | 13.26 |
| Palearctic subregion | Cantabric Coast–Languedoc | 316 | 9.46 |

# Supplementary Table.3 Australasia-specific model comparisons for invasion-state GAMs

Generalized additive models (GAMs) fitted to the Australasian subset, testing whether invasion state alters biodiversity–stability relationships. Models correspond to those defined in the Methods: m0, diversity only; m1, diversity plus invasion state; and m2, invasion-state-specific diversity smooths plus invasion state. Panel a reports overall model fit statistics, including Akaike’s Information Criterion (AIC), ΔAIC relative to the best-supported model in this table, residual degrees of freedom, and residual deviance. Panel b reports likelihood-ratio tests for sequential comparisons between nested models. ΔAIC values are calculated relative to the best-supported model within this table (ΔAIC = AIC_model − AIC_min). These comparisons test whether invasion state alters the form of biodiversity–stability relationships within Australasia. In all tables, Stability denotes temporal community stability (TCS), Diversity denotes DiversityPCA1, and Invasion_gradient denotes InvasionPCA1.

a, Model fit statistics

| **Model** | **Formula** | **df** | **AIC** | Δ**AIC** | **Resid_df** | **Resid_dev** |
| --- | --- | --- | --- | --- | --- | --- |
| m0 | Stability ~ s(Diversity) | 4.9659 | 207.1334 | 0.4024 | 115.6015 | 36.5398 |
| m1 | Stability ~ s(Diversity) + Invasion_state | 6.3226 | 206.7311 | 0 | 114.2509 | 35.5955 |
| m2 | Stability ~ s(Diversity, by = Invasion_state) + Invasion_state | 7.8718 | 208.4581 | 1.727 | 112.9475 | 35.1877 |

b, Sequential model comparisons

| **Comparison** | **Df_diff** | **Dev_diff** | **P_value** |
| --- | --- | --- | --- |
| m0 vs m1 | 1.363 | 0.9443 | 1.300e-01 |
| m1 vs m2 | 1.795 | 0.4078 | 4.706e-01 |

# Supplementary Table.4 Australasia-specific model outputs for invasion-state GAMs.

Generalized additive models (GAMs) fitted to the Australasian subset, testing whether invasion state alters biodiversity–stability relationships. Models correspond to those defined in the Methods: m0, diversity only; m1, diversity plus invasion state; and m2, invasion-state-specific diversity smooths plus invasion state. Panel a reports parametric coefficients for linear terms. Panel b reports the significance of smooth terms, including estimated degrees of freedom (edf), reference degrees of freedom (Ref.df), F statistics, and approximate P values. Panel c reports overall model fit statistics.

a, Parametric coefficients

| **Model** | **Term** | **Estimate** | **Std_Error** | **Statistic** | **P_value** |
| --- | --- | --- | --- | --- | --- |
| m0 | (Intercept) | 1.872 | 0.05154 | 36.32 | < 1E-16 |
| m1 | (Intercept) | 2.068 | 0.1556 | 13.29 | < 1E-16 |
| m1 | Invasion_state (invaded) | -0.2264 | 0.1698 | -1.333 | 1.850e-01 |
| m2 | (Intercept) | 2.284 | 0.3529 | 6.471 | 2.601e-09 |
| m2 | Invasion_state (invaded) | -0.4441 | 0.3574 | -1.242 | 2.166e-01 |

b, Smooth-term significance

| **Model** | **Term** | **edf** | **Ref_df** | **F** | **P_value** |
| --- | --- | --- | --- | --- | --- |
| m0 | s(Diversity) | 2.398 | 2.966 | 4.728 | 4.446e-03 |
| m1 | s(Diversity) | 2.749 | 3.323 | 5.055 | 2.419e-03 |
| m2 | s(Diversity):Invasion_state (non-invaded) | 1.38 | 1.62 | 1.327 | 2.045e-01 |
| m2 | s(Diversity):Invasion_state (invaded) | 2.672 | 3.252 | 4.25 | 4.782e-03 |

c, Model fit summary

| **Model** | **Adj_R2** | **Deviance_explained** | **REML** | **Scale** | **n** |
| --- | --- | --- | --- | --- | --- |
| m0 | 0.1033 | 0.1216 | 104.6 | 0.3161 | 119 |
| m1 | 0.1162 | 0.1443 | 104.6 | 0.3116 | 119 |
| m2 | 0.1162 | 0.1541 | 104.7 | 0.3115 | 119 |

# Supplementary Table.5 Australasia-specific model comparisons for invasion-intensity GAMs within invaded communities

Generalized additive models (GAMs) fitted to invaded communities only within Australasia, testing whether invasion intensity modifies biodiversity–stability relationships. Models correspond to those defined in the Methods: m5, diversity only; m6, additive smooths of diversity and invasion intensity; and m7, additive smooths plus a diversity × invasion-intensity interaction surface. Panel a reports overall model fit statistics, including Akaike’s Information Criterion (AIC), ΔAIC relative to the best-supported model in this table, residual degrees of freedom, and residual deviance. Panel b reports likelihood-ratio tests for sequential comparisons between nested models. ΔAIC values are calculated relative to the best-supported model within this table (ΔAIC = AIC_model − AIC_min). These comparisons test whether invasion intensity explains additional variation in temporal community stability and whether invasion intensity reshapes the biodiversity–stability relationship within Australasia.

a, Model fit statistics

| **Model** | **Formula** | **df** | **AIC** | Δ**AIC** | **Resid_df** | **Resid_dev** |
| --- | --- | --- | --- | --- | --- | --- |
| m5 | Stability ~ s(Diversity) | 5.164 | 185.6201 | 0 | 99.4194 | 33.073 |
| m6 | Stability ~ s(Diversity + s(Invasion_gradient) | 6.6333 | 186.5396 | 0.9195 | 98.205 | 32.4309 |
| m7 | Stability ~ s(Diversity) + s(Invasion_gradient) + te(Diversity, Invasion_gradien) | 7.5112 | 188.4566 | 2.8365 | 97.3102 | 32.4818 |

b, Sequential model comparisons

| **Comparison** | **Df_diff** | **Dev_diff** | **P_value** |
| --- | --- | --- | --- |
| m5 vs m6 | 1.724 | 0.6421 | 3.251e-01 |
| m5 vs m7 | 2.5853 | 0.59125 | 5.4e-01 |

# Supplementary Table.6 Australasia-specific model outputs for invasion-intensity GAMs within invaded communities.

Generalized additive models (GAMs) fitted to invaded communities only within Australasia, testing whether and how invasion intensity influences biodiversity–stability relationships. Models correspond to those defined in the Methods: m5, diversity only; m6, additive smooths of diversity and invasion intensity; and m7, additive smooths plus a diversity × invasion-intensity interaction surface. Panel a reports parametric coefficients for linear terms. Panel b reports the significance of smooth terms, including estimated degrees of freedom (edf), reference degrees of freedom (Ref.df), F statistics, and approximate P values. Panel c reports overall model fit statistics. In the interaction model, the tensor-product smooth te(Diversity, Invasion intensity) captures whether the effect of biodiversity on temporal community stability changes across the invasion gradient within Australasia.

a, Parametric coefficients

| **Model** | **Term** | **Estimate** | **Std_Error** | **Statistic** | **P_value** |
| --- | --- | --- | --- | --- | --- |
| m5 | (Intercept) | 1.884 | 0.05683 | 33.15 | < 1E-16 |
| m6 | (Intercept) | 1.884 | 0.05662 | 33.27 | < 1E-16 |
| m7 | (Intercept) | 1.884 | 0.05693 | 33.1 | < 1E-16 |

b, Smooth-term significance

| **Model** | **Term** | **edf** | **Ref_df** | **F** | **P_value** |
| --- | --- | --- | --- | --- | --- |
| m5 | s(Diversity) | 2.581 | 3.164 | 4.321 | 7.201e-03 |
| m6 | s(Diversity) | 2.46 | 3.04 | 3.218 | 2.375e-02 |
| m6 | s(Invasion_gradient) | 1.335 | 1.593 | 1.501 | 3.108e-01 |
| m7 | s(Diversity) | 2.403 | 2.994 | 2.481 | 5.997e-02 |
| m7 | s(Invasion_gradient) | 1.286 | 1.516 | 1.255 | 3.882e-01 |
| m7 | te(Diversity,Invasion_gradient) | 1.001 | 1.001 | 0.03312 | 8.573e-01 |

c, Model fit summary

| **Model** | **Adj_R2** | **Deviance_explained** | **REML** | **Scale** | **n** |
| --- | --- | --- | --- | --- | --- |
| m5 | 0.1103 | 0.1328 | 93.73 | 0.3327 | 103 |
| m6 | 0.1168 | 0.1496 | 94.83 | 0.3302 | 103 |
| m7 | 0.1073 | 0.1483 | 93.78 | 0.3338 | 103 |

# Supplementary Table.7 Nearctic-specific model comparisons for invasion-state GAMs.

Generalized additive models (GAMs) fitted to the Nearctic subset, testing whether invasion state alters biodiversity–stability relationships. Models correspond to those defined in the Methods: m0, diversity only; m1, diversity plus invasion state; and m2, invasion-state-specific diversity smooths plus invasion state. Panel a reports overall model fit statistics, including Akaike’s Information Criterion (AIC), ΔAIC relative to the best-supported model in this table, residual degrees of freedom, and residual deviance. Panel b reports likelihood-ratio tests for sequential comparisons between nested models. ΔAIC values are calculated relative to the best-supported model within this table (ΔAIC = AIC_model − AIC_min). These comparisons test whether invasion state alters the form of biodiversity–stability relationships within the Nearctic. In all tables, Stability denotes temporal community stability (TCS), Diversity denotes DiversityPCA1, and Invasion_gradient denotes InvasionPCA1.

a, Model fit statistics

| **Model** | **Formula** | **df** | **AIC** | Δ**AIC** | **Resid_df** | **Resid_dev** |
| --- | --- | --- | --- | --- | --- | --- |
| m0 | Stability ~ s(Diversity) | 3.0013 | 528.1829 | 17.2713 | 214.9993 | 140.9466 |
| m1 | Stability ~ s(Diversity) + Invasion_state | 4.0005 | 516.6206 | 5.7089 | 213.9998 | 132.4082 |
| m2 | Stability ~ s(Diversity, by = Invasion_state) + Invasion_state | 6.1844 | 510.9117 | 0 | 212.0518 | 126.4002 |

b, Sequential model comparisons

| **Comparison** | **Df_diff** | **Dev_diff** | **P_value** |
| --- | --- | --- | --- |
| m0 vs m1 | 0.9988 | 8.538 | 1.999e-04 |
| m1 vs m2 | 2.42 | 6.008 | 1.147e-02 |

# Supplementary Table.8 Nearctic-specific model outputs for invasion-state GAMs.

Generalized additive models (GAMs) fitted to the Nearctic subset, testing whether invasion state alters biodiversity–stability relationships. Models correspond to those defined in the Methods: m0, diversity only; m1, diversity plus invasion state; and m2, invasion-state-specific diversity smooths plus invasion state. Panel a reports parametric coefficients for linear terms. Panel b reports the significance of smooth terms, including estimated degrees of freedom (edf), reference degrees of freedom (Ref.df), F statistics, and approximate P values. Panel c reports overall model fit statistics.

a, Parametric coefficients

| **Model** | **Term** | **Estimate** | **Std_Error** | **Statistic** | **P_value** |
| --- | --- | --- | --- | --- | --- |
| m0 | (Intercept) | 1.491 | 0.05496 | 27.13 | < 1E-16 |
| m1 | (Intercept) | 2.184 | 0.1941 | 11.26 | < 1E-16 |
| m1 | Invasion_state (invaded) | -0.752 | 0.2024 | -3.715 | 2.594e-04 |
| m2 | (Intercept) | 2.97 | 0.5489 | 5.412 | 1.677e-07 |
| m2 | Invasion_state (invaded) | -1.537 | 0.5516 | -2.787 | 5.808e-03 |

b, Smooth-term significance

| **Model** | **Term** | **edf** | **Ref_df** | **F** | **P_value** |
| --- | --- | --- | --- | --- | --- |
| m0 | s(Diversity) | 1.001 | 1.001 | 0.2777 | 5.994e-01 |
| m1 | s(Diversity) | 1 | 1 | 1.535 | 2.167e-01 |
| m2 | s(Diversity):Invasion_state (non-invaded) | 1.946 | 2.181 | 2.301 | 1.345e-01 |
| m2 | s(Diversity):Invasion_state (invaded) | 1.002 | 1.004 | 0.7659 | 3.835e-01 |

c, Model fit summary

| **Model** | **Adj_R2** | **Deviance_explained** | **REML** | **Scale** | **n** |
| --- | --- | --- | --- | --- | --- |
| m0 | -0.00335 | 0.001294 | 265.1 | 0.6556 | 217 |
| m1 | 0.05303 | 0.06179 | 259 | 0.6187 | 217 |
| m2 | 0.08769 | 0.1044 | 255.8 | 0.5961 | 217 |

# Supplementary Table.9 Nearctic-specific model comparisons for invasion-intensity GAMs within invaded communities.

Generalized additive models (GAMs) fitted to invaded communities only within the Nearctic, testing whether invasion intensity modifies biodiversity–stability relationships. Models correspond to those defined in the Methods: m5, diversity only; m6, additive smooths of diversity and invasion intensity; and m7, additive smooths plus a diversity × invasion-intensity interaction surface. Panel a reports overall model fit statistics, including Akaike’s Information Criterion (AIC), ΔAIC relative to the best-supported model in this table, residual degrees of freedom, and residual deviance. Panel b reports likelihood-ratio tests for sequential comparisons between nested models. ΔAIC values are calculated relative to the best-supported model within this table (ΔAIC = AIC_model − AIC_min). These comparisons test whether invasion intensity explains additional variation in temporal community stability and whether invasion intensity reshapes the biodiversity–stability relationship within the Nearctic.

a, Model fit statistics

| **Model** | **Formula** | **df** | **AIC** | **ΔAIC** | **Resid_df** | **Resid_dev** |
| --- | --- | --- | --- | --- | --- | --- |
| m5 | Stability ~ s(Diversity) | 3.0704 | 433.5881 | 8.7619 | 197.9643 | 99.2535 |
| m6 | Stability ~ s(Diversity) + s(Invasion_gradient) | 6.5385 | 432.3665 | 7.5402 | 195.335 | 95.2865 |
| m7 | Stability ~ s(Diversity) + s(Invasion_gradient) + te(Diversity, Invasion_gradient) | 5.0005 | 424.8263 | 0 | 195.9997 | 93.1831 |

b, Sequential model comparisons

| **Comparison** | **Df_diff** | **Dev_diff** | **P_value** |
| --- | --- | --- | --- |
| m5 vs m6 | 4.307 | 3.967 | 1.089e-01 |
| m5 vs m7 | 1.896 | 6.070 | 1.473e-03 |

# Supplementary Table.10 Nearctic-specific model outputs for invasion-intensity GAMs within invaded communities.

Generalized additive models (GAMs) fitted to invaded communities only within the Nearctic, testing whether and how invasion intensity influences biodiversity–stability relationships. Models correspond to those defined in the Methods: m5, diversity only; m6, additive smooths of diversity and invasion intensity; and m7, additive smooths plus a diversity × invasion-intensity interaction surface. Panel a reports parametric coefficients for linear terms. Panel b reports the significance of smooth terms, including estimated degrees of freedom (edf), reference degrees of freedom (Ref.df), F statistics, and approximate P values. Panel c reports overall model fit statistics. In the interaction model, the tensor-product smooth te(Diversity, Invasion intensity) captures whether the effect of biodiversity on temporal community stability changes across the invasion gradient within the Nearctic.

a, Parametric coefficients

| **Model** | **Term** | **Estimate** | **Std_Error** | **Statistic** | **P_value** |
| --- | --- | --- | --- | --- | --- |
| m5 | (Intercept) | 1.436 | 0.05007 | 28.68 | < 1E-16 |
| m6 | (Intercept) | 1.436 | 0.04939 | 29.08 | < 1E-16 |
| m7 | (Intercept) | 1.436 | 0.04876 | 29.45 | < 1E-16 |

b, Smooth-term significance

| **Model** | **Term** | **edf** | **Ref_df** | **F** | **P_value** |
| --- | --- | --- | --- | --- | --- |
| m5 | s(Diversity) | 1.036 | 1.07 | 0.9128 | 3.595e-01 |
| m6 | s(Diversity) | 1.777 | 2.22 | 0.7809 | 5.172e-01 |
| m6 | s(Invasion_gradient) | 1.888 | 2.318 | 2.522 | 9.720e-02 |
| m7 | s(Diversity) | 1 | 1 | 9.076 | 2.931e-03 |
| m7 | s(Invasion_gradient) | 1 | 1 | 12.76 | 4.462e-04 |
| m7 | te(Diversity, Invasion_gradient) | 1 | 1.001 | 9.637 | 2.188e-03 |

c, Model fit summary

| **Model** | **Adj_R2** | **Deviance_explained** | **REML** | **Scale** | **n** |
| --- | --- | --- | --- | --- | --- |
| m5 | -0.00027 | 0.004937 | 217.9 | 0.5014 | 200 |
| m6 | 0.02678 | 0.04471 | 217.8 | 0.4878 | 200 |
| m7 | 0.0515 | 0.0658 | 212.2 | 0.4754 | 200 |

# Supplementary Table.11 Palearctic-specific model comparisons for invasion-state GAMs.

Generalized additive models (GAMs) fitted to the Palearctic subset, testing whether invasion state alters biodiversity–stability relationships. Models correspond to those defined in the Methods: m0, diversity only; m1, diversity plus invasion state; m2, invasion-state-specific diversity smooths plus invasion state; and m3, invasion-state-specific diversity smooths plus invasion state and freshwater ecoregion as a random-effect smooth. Panel a reports overall model fit statistics, including Akaike’s Information Criterion (AIC), ΔAIC relative to the best-supported model in this table, residual degrees of freedom, and residual deviance. Panel b reports likelihood-ratio tests for sequential comparisons between nested models. ΔAIC values are calculated relative to the best-supported model within this table (ΔAIC = AIC_model − AIC_min). These comparisons test whether invasion state alters the form of biodiversity–stability relationships within the Palearctic and whether incorporating ecoregional context further improves model fit. In all tables, Stability denotes temporal community stability (TCS), Diversity denotes DiversityPCA1, and Invasion_gradient denotes InvasionPCA1.

a, Model fit statistics

| **Model** | **Formula** | **df** | **AIC** | **ΔAIC** | **Resid_df** | **Resid_dev** |
| --- | --- | --- | --- | --- | --- | --- |
| m0 | Stability ~ s(Diversity) | 5.8398 | 6159.337 | 97.3383 | 3173.527 | 1287.648 |
| m1 | Stability ~ s(Diversity) + Invasion_state | 6.776 | 6159.752 | 97.7533 | 3172.583 | 1287.057 |
| m2 | Stability ~ s(Diversity, by = invasion_state) + Invasion_state | 9.8466 | 6142.321 | 80.3227 | 3169.804 | 1277.546 |
| m3 | Stability ~ s(Diversity, by = invasion_state) + Invasion_state + s(Ecoregion, bs = "re") | 14.3994 | 6061.998 | 0 | 3165.441 | 1242.098 |

b, Sequential model comparisons

| **Comparison** | **Df_diff** | **Dev_diff** | **P_value** |
| --- | --- | --- | --- |
| m0 vs m1 | 0.9611 | 0.5904 | 2.103e-01 |
| m1 vs m2 | 3.326 | 9.511 | 3.470e-05 |
| m2 vs m3 | 4.943 | 35.45 | < 1E-16 |

# Supplementary Table.12 Palearctic-specific model outputs for invasion-state GAMs.

Generalized additive models (GAMs) fitted to the Palearctic subset, testing whether invasion state alters biodiversity–stability relationships. Models correspond to those defined in the Methods: m0, diversity only; m1, diversity plus invasion state; m2, invasion-state-specific diversity smooths plus invasion state; and m3, invasion-state-specific diversity smooths plus invasion state and freshwater ecoregion as a random-effect smooth. Panel a reports parametric coefficients for linear terms. Panel b reports the significance of smooth terms, including estimated degrees of freedom (edf), reference degrees of freedom (Ref.df), F statistics, and approximate P values. Panel c reports overall model fit statistics.

a, Parametric coefficients

| **Model** | **Term** | **Estimate** | **Std_Error** | **Statistic** | **P_value** |
| --- | --- | --- | --- | --- | --- |
| m0 | (Intercept) | 1.621 | 0.0113 | 143.5 | < 1E-16 |
| m1 | (Intercept) | 1.605 | 0.01628 | 98.58 | < 1E-16 |
| m1 | Invasion_state (invaded) | 0.04058 | 0.02997 | 1.354 | 1.758e-01 |
| m2 | (Intercept) | 1.651 | 0.02675 | 61.71 | < 1E-16 |
| m2 | Invasion_state (invaded) | 0.04073 | 0.03584 | 1.136 | 2.559e-01 |
| m3 | (Intercept) | 1.697 | 0.08008 | 21.2 | < 1E-16 |
| m3 | Invasion_state (invaded) | -0.03472 | 0.03643 | -0.953 | 3.407e-01 |

b, Smooth-term significance

| **Model** | **Term** | **edf** | **Ref_df** | **F** | **P_value** |
| --- | --- | --- | --- | --- | --- |
| m0 | s(Diversity) | 3.473 | 3.848 | 8.902 | 1.147e-06 |
| m1 | s(Diversity) | 3.417 | 3.816 | 9.225 | 5.266e-07 |
| m2 | s(Diversity):Invasion_state (non-invaded) | 2.522 | 2.915 | 6.337 | 1.351e-03 |
| m2 | s(Diversity):Invasion_state (invaded) | 3.675 | 3.936 | 11.47 | < 1E-16 |
| m3 | s(Diversity):Invasion_state (non-invaded) | 2.362 | 2.767 | 6.815 | 6.944e-04 |
| m3 | s(Diversity):Invasion_state (invaded) | 3.766 | 3.966 | 16.95 | < 1E-16 |
| m3 | s(Ecoregion, bs = "re") | 4.431 | 5 | 17.16 | < 1E-16 |

c, Model fit summary

| **Model** | **Adj_R2** | **Deviance_explained** | **REML** | **Scale** | **n** |
| --- | --- | --- | --- | --- | --- |
| m0 | 0.0111 | 0.01219 | 3086 | 0.4057 | 3178 |
| m1 | 0.01126 | 0.01264 | 3087 | 0.4057 | 3178 |
| m2 | 0.01771 | 0.01994 | 3082 | 0.403 | 3178 |
| m3 | 0.04365 | 0.04713 | 3046 | 0.3924 | 3178 |

# Supplementary Table.13 Palearctic-specific model comparisons for invasion-intensity GAMs within invaded communities.

Generalized additive models (GAMs) fitted to invaded communities only within the Palearctic, testing whether invasion intensity modifies biodiversity–stability relationships. Models correspond to those defined in the Methods: m5, diversity only; m6, additive smooths of diversity and invasion intensity; m7, additive smooths plus a diversity × invasion-intensity interaction surface; and m8, the same interaction model including freshwater ecoregion as a random-effect smooth. Panel a reports overall model fit statistics, including Akaike’s Information Criterion (AIC), ΔAIC relative to the best-supported model in this table, residual degrees of freedom, and residual deviance. Panel b reports likelihood-ratio tests for sequential comparisons between nested models. ΔAIC values are calculated relative to the best-supported model within this table (ΔAIC = AIC_model − AIC_min). These comparisons test whether invasion intensity explains additional variation in temporal community stability, whether invasion intensity reshapes the biodiversity–stability relationship within the Palearctic, and whether incorporating ecoregional context further improves model fit.

a, Model fit statistics

| **Model** | **Formula** | **df** | **AIC** | **ΔAIC** | **Resid_df** | **Resid_dev** |
| --- | --- | --- | --- | --- | --- | --- |
| m5 | Stability ~ s(Diversity) | 5.889 | 2472.591 | 79.9516 | 1238.445 | 526.9696 |
| m6 | Stability ~ s(Diversity) + s(Invasion_gradient) | 8.1293 | 2440.321 | 47.6813 | 1236.622 | 511.6172 |
| m7 | Stability ~ s(Diversity + s(Invasion_gradient) + te(Diversity, Invasion_gradient) | 10.4627 | 2442.767 | 50.128 | 1234.874 | 510.7041 |
| m8 | Stability ~ s(Diversity) + s(Invasion_gradient) + te(Diversity, Invasion_gradient) + s(Ecoregion, bs = "re") | 12.0677 | 2392.639 | 0 | 1232.565 | 489.253 |

b, Sequential model comparisons

| **Comparison** | **Df_diff** | **Dev_diff** | **P_value** |
| --- | --- | --- | --- |
| m5 vs m6 | 2.658 | 15.35 | 1.604e-08 |
| m6 vs m7 | 2.919 | 0.913 | 4.976e-01 |
| m7 vs m8 | 1.132 | 21.45 | 5.001e-13 |

# Supplementary Table.14 Palearctic-specific model outputs for invasion-intensity GAMs within invaded communities.

Generalized additive models (GAMs) fitted to invaded communities only within the Palearctic, testing whether and how invasion intensity influences biodiversity–stability relationships. Models correspond to those defined in the Methods: m5, diversity only; m6, additive smooths of diversity and invasion intensity; m7, additive smooths plus a diversity × invasion-intensity interaction surface; and m8, the same interaction model including freshwater ecoregion as a random-effect smooth. Panel a reports parametric coefficients for linear terms. Panel b reports the significance of smooth terms, including estimated degrees of freedom (edf), reference degrees of freedom (Ref.df), F statistics, and approximate P values. Panel c reports overall model fit statistics. In the interaction models, the tensor-product smooth te(Diversity, Invasion intensity) captures whether the effect of biodiversity on temporal community stability changes across the invasion gradient within the Palearctic.

a, Parametric coefficients

| **Model** | **Term** | **Estimate** | **Std_Error** | **Statistic** | **P_value** |
| --- | --- | --- | --- | --- | --- |
| m5 | (Intercept) | 1.621 | 0.0185 | 87.63 | < 1E-16 |
| m6 | (Intercept) | 1.621 | 0.01824 | 88.87 | < 1E-16 |
| m7 | (Intercept) | 1.621 | 0.01824 | 88.89 | < 1E-16 |
| m8 | (Intercept) | 1.608 | 0.06998 | 22.97 | < 1E-16 |

b, Smooth-term significance

| **Model** | **Term** | **edf** | **Ref_df** | **F** | **P_value** |
| --- | --- | --- | --- | --- | --- |
| m5 | s(Diversity) | 3.555 | 3.889 | 8.976 | 4.240e-07 |
| m6 | s(Diversity) | 3.577 | 3.899 | 11.36 | < 1E-16 |
| m6 | s(Invasion_gradient) | 1.801 | 2.23 | 16.17 | < 1E-16 |
| m7 | s(Diversity) | 3.488 | 3.801 | 5.725 | 1.206e-03 |
| m7 | s(Invasion_gradient) | 1.604 | 1.935 | 4.676 | 2.072e-02 |
| m7 | te(Diversity,Invasion_gradient) | 2.034 | 2.727 | 0.05567 | 9.737e-01 |
| m8 | s(Diversity) | 3.696 | 3.946 | 9.879 | 4.653e-07 |
| m8 | s(Invasion_gradient) | 1 | 1 | 39.17 | < 1E-16 |
| m8 | te(Diversity,Invasion_gradient) | 1.004 | 1.007 | 0.02169 | 8.939e-01 |
| m8 | s(Ecoregion, bs = "re") | 3.735 | 5 | 10.67 | < 1E-16 |

c, Model fit summary

| **Model** | **Adj_R2** | **Deviance_explained** | **REML** | **Scale** | **n** |
| --- | --- | --- | --- | --- | --- |
| m5 | 0.02876 | 0.03154 | 1241 | 0.4255 | 1243 |
| m6 | 0.05566 | 0.05975 | 1227 | 0.4137 | 1243 |
| m7 | 0.05601 | 0.06143 | 1226 | 0.4136 | 1243 |
| m8 | 0.09397 | 0.1009 | 1205 | 0.3969 | 1243 |

# Supplementary Table.15 Cantabric Coast–Languedoc-specific model comparisons for invasion-state GAMs.

Generalized additive models (GAMs) fitted to the Cantabric Coast–Languedoc subset, testing whether invasion state alters biodiversity–stability relationships. Models correspond to those defined in the Methods: m0, diversity only; m1, diversity plus invasion state; and m2, invasion-state-specific diversity smooths plus invasion state. Panel a reports overall model fit statistics, including Akaike’s Information Criterion (AIC), ΔAIC relative to the best-supported model in this table, residual degrees of freedom, and residual deviance. Panel b reports likelihood-ratio tests for sequential comparisons between nested models. ΔAIC values are calculated relative to the best-supported model within this table (ΔAIC = AIC_model − AIC_min). These comparisons test whether invasion state alters the form of biodiversity–stability relationships within this ecoregion. In all tables, Stability denotes temporal community stability (TCS), Diversity denotes DiversityPCA1, and Invasion_gradient denotes InvasionPCA1.

a, Model fit statistics

| **Model** | **Formula** | **df** | **AIC** | Δ**AIC** | **Resid_df** | **Resid_dev** |
| --- | --- | --- | --- | --- | --- | --- |
| m0 | Stability ~ s(Diversity) | 5.9167 | 587.3426 | 3.1449 | 289.3883 | 121.9019 |
| m1 | Stability ~ s(Diversity) + Invasion_state | 6.9171 | 584.1977 | 0 | 288.3878 | 119.7869 |
| m2 | Stability ~ s(Diversity, by = Invasion_state) + Invasion_state | 9.3098 | 588.1317 | 3.934 | 286.45 | 119.4405 |

b, Sequential model comparisons

| **Comparison** | **Df_diff** | **Dev_diff** | **P_value** |
| --- | --- | --- | --- |
| m0 vs m1 | 1 | 2.115 | 2.508e-02 |
| m1 vs m2 | 2.848 | 0.3464 | 8.212e-01 |

# Supplementary Table.16 Cantabric Coast–Languedoc-specific model outputs for invasion-state GAMs.

Generalized additive models (GAMs) fitted to the Cantabric Coast–Languedoc subset, testing whether invasion state alters biodiversity–stability relationships. Models correspond to those defined in the Methods: m0, diversity only; m1, diversity plus invasion state; and m2, invasion-state-specific diversity smooths plus invasion state. Panel a reports parametric coefficients for linear terms. Panel b reports the significance of smooth terms, including estimated degrees of freedom (edf), reference degrees of freedom (Ref.df), F statistics, and approximate P values. Panel c reports overall model fit statistics.

a, Parametric coefficients

| **Model** | **Term** | **Estimate** | **Std_Error** | **Statistic** | **P_value** |
| --- | --- | --- | --- | --- | --- |
| m0 | (Intercept) | 1.719 | 0.03785 | 45.42 | < 1E-16 |
| m1 | (Intercept) | 1.576 | 0.07369 | 21.38 | < 1E-16 |
| m1 | Invasion_state (invaded) | 0.2118 | 0.09364 | 2.262 | 2.442e-02 |
| m2 | (Intercept) | 1.763 | 0.2169 | 8.127 | 1.335e-14 |
| m2 | Invasion_state (invaded) | 0.03407 | 0.2225 | 0.1531 | 8.784e-01 |

b, Smooth-term significance

| **Model** | **Term** | **edf** | **Ref_df** | **F** | **P_value** |
| --- | --- | --- | --- | --- | --- |
| m0 | s(Diversity) | 3.612 | 3.917 | 4.351 | 1.475e-03 |
| m1 | s(Diversity) | 3.612 | 3.917 | 5.355 | 2.831e-04 |
| m2 | s(Diversity):Invasion_state (non-invaded) | 2.151 | 2.498 | 4.344 | 4.896e-02 |
| m2 | s(Diversity):Invasion_state (invaded) | 3.399 | 3.812 | 3.475 | 1.227e-02 |

c, Model fit summary

| **Model** | **Adj_R2** | **Deviance_explained** | **REML** | **Scale** | **n** |
| --- | --- | --- | --- | --- | --- |
| m0 | 0.05825 | 0.06985 | 297.6 | 0.4212 | 294 |
| m1 | 0.07137 | 0.08599 | 296.5 | 0.4154 | 294 |
| m2 | 0.0678 | 0.08864 | 298 | 0.417 | 294 |

# Supplementary Table.17 Cantabric Coast–Languedoc-specific model comparisons for invasion-intensity GAMs within invaded communities.

Generalized additive models (GAMs) fitted to invaded communities only within the Cantabric Coast–Languedoc ecoregion, testing whether invasion intensity modifies biodiversity–stability relationships. Models correspond to those defined in the Methods: m5, diversity only; m6, additive smooths of diversity and invasion intensity; and m7, additive smooths plus a diversity × invasion-intensity interaction surface. Panel a reports overall model fit statistics, including Akaike’s Information Criterion (AIC), ΔAIC relative to the best-supported model in this table, residual degrees of freedom, and residual deviance. Panel b reports likelihood-ratio tests for sequential comparisons between nested models. ΔAIC values are calculated relative to the best-supported model within this table (ΔAIC = AIC_model − AIC_min). These comparisons test whether invasion intensity explains additional variation in temporal community stability and whether invasion intensity reshapes the biodiversity–stability relationship within this ecoregion.

a, Model fit statistics

| **Model** | **Formula** | **df** | **AIC** | Δ**AIC** | **Resid_df** | **Resid_dev** |
| --- | --- | --- | --- | --- | --- | --- |
| m5 | Stability ~ s(Diversity) | 5.7506 | 387.943 | 16.6061 | 194.7042 | 77.2537 |
| m6 | Stability ~ s(Diversity) + s(Invasion_gradient) | 7.8688 | 371.3369 | 0 | 192.8912 | 69.5718 |
| m7 | Stability ~ s(Diversity) + s(Invasion_gradient) + te(Diversity, Invasion_gradient) | 10.9565 | 372.1479 | 0.811 | 190.3448 | 67.7214 |

b, Sequential model comparisons

| **Comparison** | **Df_diff** | **Dev_diff** | **P_value** |
| --- | --- | --- | --- |
| m5 vs m6 | 2.423 | 7.682 | 6.572e-05 |
| m6 vs m7 | 3.629 | 1.85 | 2.284e-01 |

# Supplementary Table.18 Cantabric Coast–Languedoc-specific model outputs for invasion-intensity GAMs within invaded communities.

Generalized additive models (GAMs) fitted to invaded communities only within the Cantabric Coast–Languedoc ecoregion, testing whether and how invasion intensity influences biodiversity–stability relationships. Models correspond to those defined in the Methods: m5, diversity only; m6, additive smooths of diversity and invasion intensity; and m7, additive smooths plus a diversity × invasion-intensity interaction surface. Panel a reports parametric coefficients for linear terms. Panel b reports the significance of smooth terms, including estimated degrees of freedom (edf), reference degrees of freedom (Ref.df), F statistics, and approximate P values. Panel c reports overall model fit statistics. In the interaction model, the tensor-product smooth te(Diversity, Invasion intensity) captures whether the effect of biodiversity on temporal community stability changes across the invasion gradient within this ecoregion.

a, Parametric coefficients

| **Model** | **Term** | **Estimate** | **Std_Error** | **Statistic** | **P_value** |
| --- | --- | --- | --- | --- | --- |
| m5 | (Intercept) | 1.749 | 0.04465 | 39.18 | < 1E-16 |
| m6 | (Intercept) | 1.749 | 0.04257 | 41.09 | < 1E-16 |
| m7 | (Intercept) | 1.749 | 0.04228 | 41.37 | < 1E-16 |

b, Smooth-term significance

| **Model** | **Term** | **edf** | **Ref_df** | **F** | **P_value** |
| --- | --- | --- | --- | --- | --- |
| m5 | s(Diversity) | 3.296 | 3.751 | 2.999 | 1.754e-02 |
| m6 | s(Diversity) | 3.475 | 3.854 | 3.592 | 5.796e-03 |
| m6 | s(Invasion_gradient) | 1.634 | 2.015 | 9.747 | 9.028e-05 |
| m7 | s(Diversity) | 1 | 1 | 2.679 | 1.034e-01 |
| m7 | s(Invasion_gradient) | 1.728 | 2.126 | 0.7921 | 4.476e-01 |
| m7 | te(Diversity,Invasion_gradient) | 4.927 | 5.831 | 3.303 | 6.025e-03 |

c, Model fit summary

| **Model** | **Adj_R2** | **Deviance_explained** | **REML** | **Scale** | **n** |
| --- | --- | --- | --- | --- | --- |
| m5 | 0.05719 | 0.07289 | 196.5 | 0.3968 | 199 |
| m6 | 0.143 | 0.1651 | 189.7 | 0.3607 | 199 |
| m7 | 0.1546 | 0.1873 | 188 | 0.3558 | 199 |

# Supplementary Table.19 Central & Western Europe-specific model comparisons for invasion-state GAMs.

Generalized additive models (GAMs) fitted to the Central & Western Europe subset, testing whether invasion state alters biodiversity–stability relationships. Models correspond to those defined in the Methods: m0, diversity only; m1, diversity plus invasion state; and m2, invasion-state-specific diversity smooths plus invasion state. Panel a reports overall model fit statistics, including Akaike’s Information Criterion (AIC), ΔAIC relative to the best-supported model in this table, residual degrees of freedom, and residual deviance. Panel b reports likelihood-ratio tests for sequential comparisons between nested models. ΔAIC values are calculated relative to the best-supported model within this table (ΔAIC = AIC_model − AIC_min). These comparisons test whether invasion state alters the form of biodiversity–stability relationships within this ecoregion. In all tables, Stability denotes temporal community stability (TCS), Diversity denotes DiversityPCA1, and Invasion_gradient denotes InvasionPCA1.

a, Model fit statistics

| **Model** | **Formula** | **df** | **AIC** | **Delta_AIC** | **Resid_df** | **Resid_dev** |
| --- | --- | --- | --- | --- | --- | --- |
| m0 | Stability ~ s(Diversity) | 5.4718 | 854.3418 | 10.6376 | 432.0513 | 176.649 |
| m1 | Stability ~ s(Diversity) + Invasion_state | 6.1818 | 848.5702 | 4.866 | 431.3646 | 173.7592 |
| m2 | Stability ~ s(Diversity, by = Invasion_state) + Invasion_state | 6.9372 | 843.7043 | 0 | 430.6746 | 171.2363 |

b, Sequential model comparisons

| **Comparison** | **Df_diff** | **Dev_diff** | **P_value** |
| --- | --- | --- | --- |
| m0 vs m1 | 0.7332 | 2.89 | 4.375e-03 |
| m1 vs m2 | 0.8208 | 2.523 | 8.805e-03 |

# Supplementary Table.20 Central & Western Europe-specific model outputs for invasion-state GAMs.

Generalized additive models (GAMs) fitted to the Central & Western Europe subset, testing whether invasion state alters biodiversity–stability relationships. Models correspond to those defined in the Methods: m0, diversity only; m1, diversity plus invasion state; and m2, invasion-state-specific diversity smooths plus invasion state. Panel a reports parametric coefficients for linear terms. Panel b reports the significance of smooth terms, including estimated degrees of freedom (edf), reference degrees of freedom (Ref.df), F statistics, and approximate P values. Panel c reports overall model fit statistics.

a, Parametric coefficients

| **Model** | **Term** | **Estimate** | **Std_Error** | **Statistic** | **P_value** |
| --- | --- | --- | --- | --- | --- |
| m0 | (Intercept) | 1.784 | 0.03062 | 58.26 | < 1E-16 |
| m1 | (Intercept) | 2.067 | 0.1002 | 20.62 | < 1E-16 |
| m1 | Invasion_state (invaded) | -0.3174 | 0.1073 | -2.957 | 3.277e-03 |
| m2 | (Intercept) | 1.82 | 0.2304 | 7.9 | 2.357e-14 |
| m2 | Invasion_state (invaded) | -0.08047 | 0.2326 | -0.3459 | 7.296e-01 |

b, Smooth-term significance

| **Model** | **Term** | **edf** | **Ref_df** | **F** | **P_value** |
| --- | --- | --- | --- | --- | --- |
| m0 | s(Diversity) | 2.949 | 3.472 | 10.06 | 1.660e-06 |
| m1 | s(Diversity) | 2.635 | 3.182 | 5.128 | 1.630e-03 |
| m2 | s(Diversity):Invasion_state (non-invaded) | 2.069 | 2.467 | 6.983 | 3.296e-04 |
| m2 | s(Diversity):Invasion_state (invaded) | 1.256 | 1.47 | 2.335 | 7.782e-02 |

c, Model fit summary

| **Model** | **Adj_R2** | **Deviance_explained** | **REML** | **Scale** | **n** |
| --- | --- | --- | --- | --- | --- |
| m0 | 0.07205 | 0.07834 | 429.9 | 0.4089 | 436 |
| m1 | 0.08578 | 0.09342 | 426.9 | 0.4028 | 436 |
| m2 | 0.09761 | 0.1066 | 424.3 | 0.3976 | 436 |

# Supplementary Table.21 Central & Western Europe-specific model comparisons for invasion-intensity GAMs within invaded communities.

Generalized additive models (GAMs) fitted to invaded communities only within the Central & Western Europe ecoregion, testing whether invasion intensity modifies biodiversity–stability relationships. Models correspond to those defined in the Methods: m5, diversity only; m6, additive smooths of diversity and invasion intensity; and m7, additive smooths plus a diversity × invasion-intensity interaction surface. Panel a reports overall model fit statistics, including Akaike’s Information Criterion (AIC), ΔAIC relative to the best-supported model in this table, residual degrees of freedom, and residual deviance. Panel b reports likelihood-ratio tests for sequential comparisons between nested models. ΔAIC values are calculated relative to the best-supported model within this table (ΔAIC = AIC_model − AIC_min). These comparisons test whether invasion intensity explains additional variation in temporal community stability and whether invasion intensity reshapes the biodiversity–stability relationship within this ecoregion.

a, Model fit statistics

| **Model** | **Formula** | **df** | **AIC** | **ΔAIC** | **Resid_df** | **Resid_dev** |
| --- | --- | --- | --- | --- | --- | --- |
| m5 | Stability ~ s(Diversity) | 3.6435 | 699.8738 | 9.0247 | 385.6364 | 135.3882 |
| m6 | Stability ~ s(Diversity) + s(Invasion_gradient) | 4.8073 | 693.4321 | 2.5831 | 384.5281 | 132.3626 |
| m7 | Stability ~ s(Diversity) + s(Invasion_gradient) + te(Diversity, Invasion_gradient) | 5.0018 | 690.849 | 0 | 383.9991 | 131.3525 |

b, Sequential model comparisons

| **Comparison** | **Df_diff** | **Dev_diff** | **P_value** |
| --- | --- | --- | --- |
| m5 vs m6 | 1.219 | 3.026 | 4.651e-03 |
| m5 vs m7 | 1.079 | 4.036 | 6.891e-04 |

# Supplementary Table.22 Central & Western Europe-specific model outputs for invasion-intensity GAMs within invaded communities.

Generalized additive models (GAMs) fitted to invaded communities only within the Central & Western Europe ecoregion, testing whether and how invasion intensity influences biodiversity–stability relationships. Models correspond to those defined in the Methods: m5, diversity only; m6, additive smooths of diversity and invasion intensity; and m7, additive smooths plus a diversity × invasion-intensity interaction surface. Panel a reports parametric coefficients for linear terms. Panel b reports the significance of smooth terms, including estimated degrees of freedom (edf), reference degrees of freedom (Ref.df), F statistics, and approximate P values. Panel c reports overall model fit statistics. In the interaction model, the tensor-product smooth te(Diversity, Invasion intensity) captures whether the effect of biodiversity on temporal community stability changes across the invasion gradient within this ecoregion.

a, Parametric coefficients

| **Model** | **Term** | **Estimate** | **Std_Error** | **Statistic** | **P_value** |
| --- | --- | --- | --- | --- | --- |
| m5 | (Intercept) | 1.729 | 0.03008 | 57.49 | < 1E-16 |
| m6 | (Intercept) | 1.729 | 0.02979 | 58.06 | < 1E-16 |
| m7 | (Intercept) | 1.729 | 0.02969 | 58.24 | < 1E-16 |

b, Smooth-term significance

| **Model** | **Term** | **edf** | **Ref_df** | **F** | **P_value** |
| --- | --- | --- | --- | --- | --- |
| m5 | s(Diversity) | 1.364 | 1.643 | 2.363 | 6.854e-02 |
| m6 | s(Diversity) | 1.472 | 1.807 | 0.8176 | 3.303e-01 |
| m6 | s(Invasion_gradient) | 1 | 1.001 | 8.543 | 3.671e-03 |
| m7 | s(Diversity) | 1 | 1 | 2.956 | 8.635e-02 |
| m7 | s(Invasion_gradient) | 1 | 1 | 9.212 | 2.568e-03 |
| m7 | te(Diversity,Invasion_gradient) | 1.001 | 1.002 | 4.155 | 4.228e-02 |

c, Model fit summary

| **Model** | **Adj_R2** | **Deviance_explained** | **REML** | **Scale** | **n** |
| --- | --- | --- | --- | --- | --- |
| m5 | 0.01045 | 0.01394 | 351.9 | 0.3511 | 388 |
| m6 | 0.02978 | 0.03597 | 350.2 | 0.3442 | 388 |
| m7 | 0.03585 | 0.04333 | 347.2 | 0.3421 | 388 |

# Supplementary Table.23 Great Britain-specific model comparisons for invasion-state GAMs.

Generalized additive models (GAMs) fitted to the Great Britain subset, testing whether invasion state alters biodiversity–stability relationships. Models correspond to those defined in the Methods: m0, diversity only; m1, diversity plus invasion state; and m2, invasion-state-specific diversity smooths plus invasion state. Panel a reports overall model fit statistics, including Akaike’s Information Criterion (AIC), ΔAIC relative to the best-supported model in this table, residual degrees of freedom, and residual deviance. Panel b reports likelihood-ratio tests for sequential comparisons between nested models. ΔAIC values are calculated relative to the best-supported model within this table (ΔAIC = AIC_model − AIC_min). These comparisons test whether invasion state alters the form of biodiversity–stability relationships within this ecoregion. In all tables, Stability denotes temporal community stability (TCS), Diversity denotes DiversityPCA1, and Invasion_gradient denotes InvasionPCA1.

a, Model fit statistics

| **Model** | **Formula** | **df** | **AIC** | Δ**AIC** | **Resid_df** | **Resid_dev** |
| --- | --- | --- | --- | --- | --- | --- |
| m0 | Stability ~ s(Diversity) | 5.3011 | 2015.334 | 17.926 | 994.8496 | 435.1177 |
| m1 | Stability ~ s(Diversity) + Invasion_state | 6.3015 | 2014.24 | 16.8315 | 993.8716 | 433.7716 |
| m2 | Stability ~ s(Diversity, by = Invasion_state) + Invasion_state | 10.3573 | 1997.408 | 0 | 990.3491 | 423.0753 |

b, Sequential model comparisons

| **Comparison** | **Df_diff** | **Dev_diff** | **P_value** |
| --- | --- | --- | --- |
| m0 vs m1 | 1.005 | 1.346 | 7.676e-02 |
| m1 vs m2 | 4.269 | 10.7 | 7.503e-05 |

# Supplementary Table.24 Great Britain-specific model outputs for invasion-state GAMs.

Generalized additive models (GAMs) fitted to the Great Britain subset, testing whether invasion state alters biodiversity–stability relationships. Models correspond to those defined in the Methods: m0, diversity only; m1, diversity plus invasion state; and m2, invasion-state-specific diversity smooths plus invasion state. Panel a reports parametric coefficients for linear terms. Panel b reports the significance of smooth terms, including estimated degrees of freedom (edf), reference degrees of freedom (Ref.df), F statistics, and approximate P values. Panel c reports overall model fit statistics.

a, Parametric coefficients

| **Model** | **Term** | **Estimate** | **Std_Error** | **Statistic** | **P_value** |
| --- | --- | --- | --- | --- | --- |
| m0 | (Intercept) | 1.589 | 0.02092 | 75.92 | < 1E-16 |
| m1 | (Intercept) | 1.632 | 0.032 | 51 | < 1E-16 |
| m1 | Invasion_state (invaded) | -0.08579 | 0.04811 | -1.783 | 7.487e-02 |
| m2 | (Intercept) | 1.647 | 0.03419 | 48.18 | < 1E-16 |
| m2 | Invasion_state (invaded) | -0.08141 | 0.04796 | -1.697 | 8.992e-02 |

b, Smooth-term significance

| **Model** | **Term** | **edf** | **Ref_df** | **F** | **P_value** |
| --- | --- | --- | --- | --- | --- |
| m0 | s(Diversity) | 3.15 | 3.639 | 18.16 | < 1E-16 |
| m1 | s(Diversity) | 3.128 | 3.622 | 12.83 | < 1E-16 |
| m2 | s(Diversity):Invasion_state (non-invaded) | 2.927 | 3.402 | 5.852 | 3.687e-04 |
| m2 | s(Diversity):Invasion_state (invaded) | 3.724 | 3.956 | 12.05 | < 1E-16 |

c, Model fit summary

| **Model** | **Adj_R2** | **Deviance_explained** | **REML** | **Scale** | **n** |
| --- | --- | --- | --- | --- | --- |
| m0 | 0.06128 | 0.06424 | 1012 | 0.4374 | 999 |
| m1 | 0.06326 | 0.06714 | 1012 | 0.4364 | 999 |
| m2 | 0.08311 | 0.09014 | 1007 | 0.4272 | 999 |

# Supplementary Table.25 Great Britain-specific model comparisons for invasion-intensity GAMs within invaded communities.

Generalized additive models (GAMs) fitted to invaded communities only within the Great Britain ecoregion, testing whether invasion intensity modifies biodiversity–stability relationships. Models correspond to those defined in the Methods: m5, diversity only; m6, additive smooths of diversity and invasion intensity; and m7, additive smooths plus a diversity × invasion-intensity interaction surface. Panel a reports overall model fit statistics, including Akaike’s Information Criterion (AIC), ΔAIC relative to the best-supported model in this table, residual degrees of freedom, and residual deviance. Panel b reports likelihood-ratio tests for sequential comparisons between nested models. ΔAIC values are calculated relative to the best-supported model within this table (ΔAIC = AIC_model − AIC_min). These comparisons test whether invasion intensity explains additional variation in temporal community stability and whether invasion intensity reshapes the biodiversity–stability relationship within this ecoregion.

a, Model fit statistics

| **Model** | **Formula** | **df** | **AIC** | Δ**AIC** | **Resid_df** | **Resid_dev** |
| --- | --- | --- | --- | --- | --- | --- |
| m5 | Stability ~ s(Diversity) | 5.927 | 1053.974 | 7.5116 | 498.3603 | 233.8132 |
| m6 | Stability ~ s(Diversity) + s(Invasion_gradient) | 7.2954 | 1046.463 | 0 | 497.1629 | 229.0976 |
| m7 | Stability ~ s(Diversity) + s(Invasion_gradient) + te(Diversity, Invasion_gradient) | 8.4093 | 1047.818 | 1.3549 | 496.0863 | 228.7004 |

b, Sequential model comparisons

| **Comparison** | **Df_diff** | **Dev_diff** | **P_value** |
| --- | --- | --- | --- |
| m5 vs m6 | 1.539 | 4.716 | 3.503e-03 |
| m6 vs m7 | 1.151 | 0.3972 | 4.050e-01 |

# Supplementary Table.26 Great Britain-specific model outputs for invasion-intensity GAMs within invaded communities.

Generalized additive models (GAMs) fitted to invaded communities only within the Great Britain ecoregion, testing whether and how invasion intensity influences biodiversity–stability relationships. Models correspond to those defined in the Methods: m5, diversity only; m6, additive smooths of diversity and invasion intensity; and m7, additive smooths plus a diversity × invasion-intensity interaction surface. Panel a reports parametric coefficients for linear terms. Panel b reports the significance of smooth terms, including estimated degrees of freedom (edf), reference degrees of freedom (Ref.df), F statistics, and approximate P values. Panel c reports overall model fit statistics. In the interaction model, the tensor-product smooth te(Diversity, Invasion intensity) captures whether the effect of biodiversity on temporal community stability changes across the invasion gradient within this ecoregion.

a, Parametric coefficients

| **Model** | **Term** | **Estimate** | **Std_Error** | **Statistic** | **P_value** |
| --- | --- | --- | --- | --- | --- |
| m5 | (Intercept) | 1.491 | 0.03054 | 48.8 | < 1E-16 |
| m6 | (Intercept) | 1.491 | 0.03027 | 49.25 | < 1E-16 |
| m7 | (Intercept) | 1.491 | 0.03027 | 49.23 | < 1E-16 |

b, Smooth-term significance

| **Model** | **Term** | **edf** | **Ref_df** | **F** | **P_value** |
| --- | --- | --- | --- | --- | --- |
| m5 | s(Diversity) | 3.64 | 3.927 | 10.37 | < 1E-16 |
| m6 | s(Diversity) | 3.637 | 3.926 | 11.52 | < 1E-16 |
| m6 | s(Invasion_gradient) | 1.2 | 1.369 | 8.008 | 4.395e-03 |
| m7 | s(Diversity) | 3.648 | 3.93 | 9.624 | 1.392e-06 |
| m7 | s(Invasion_gradient) | 1.259 | 1.467 | 8.023 | 4.084e-03 |
| m7 | te(Diversity,Invasion_gradient) | 1.007 | 1.012 | 0.561 | 4.513e-01 |

c, Model fit summary

| **Model** | **Adj_R2** | **Deviance_explained** | **REML** | **Scale** | **n** |
| --- | --- | --- | --- | --- | --- |
| m5 | 0.07832 | 0.085 | 531.5 | 0.4692 | 503 |
| m6 | 0.09474 | 0.1035 | 529.2 | 0.4608 | 503 |
| m7 | 0.09434 | 0.105 | 527.7 | 0.461 | 503 |

# Supplementary Table.27 Northern Baltic Drainages-specific model comparisons for invasion-state GAMs.

Generalized additive models (GAMs) fitted to the Northern Baltic Drainages subset, testing whether invasion state alters biodiversity–stability relationships. Models correspond to those defined in the Methods: m0, diversity only; m1, diversity plus invasion state; and m2, invasion-state-specific diversity smooths plus invasion state. Panel a reports overall model fit statistics, including Akaike’s Information Criterion (AIC), ΔAIC relative to the best-supported model in this table, residual degrees of freedom, and residual deviance. Panel b reports likelihood-ratio tests for sequential comparisons between nested models. ΔAIC values are calculated relative to the best-supported model within this table (ΔAIC = AIC_model − AIC_min). These comparisons test whether invasion state alters the form of biodiversity–stability relationships within this ecoregion. In all tables, Stability denotes temporal community stability (TCS), Diversity denotes DiversityPCA1, and Invasion_gradient denotes InvasionPCA1.

a, Model fit statistics

| **Model** | **Formula** | **df** | **AIC** | Δ**AIC** | **Resid_df** | **Resid_dev** |
| --- | --- | --- | --- | --- | --- | --- |
| m0 | Stability ~ s(Diversity) | 5.7194 | 2431.463 | 4.6441 | 1369.591 | 468.2034 |
| m1 | Stability ~ s(Diversity) + Invasion_state | 6.7357 | 2426.819 | 0 | 1368.583 | 465.9338 |
| m2 | Stability ~ s(Diversity, by = Invasion_state) + Invasion_state | 10.0008 | 2428.837 | 2.0185 | 1365.953 | 464.4063 |

b, Sequential model comparisons

| **Comparison** | **Df_diff** | **Dev_diff** | **P_value** |
| --- | --- | --- | --- |
| m0 vs m1 | 1.013 | 2.27 | 1.009e-02 |
| m1 vs m2 | 3.815 | 1.527 | 3.188e-01 |

# Supplementary Table.28 Northern Baltic Drainages-specific model outputs for invasion-state GAMs.

Generalized additive models (GAMs) fitted to the Northern Baltic Drainages subset, testing whether invasion state alters biodiversity–stability relationships. Models correspond to those defined in the Methods: m0, diversity only; m1, diversity plus invasion state; and m2, invasion-state-specific diversity smooths plus invasion state. Panel a reports parametric coefficients for linear terms. Panel b reports the significance of smooth terms, including estimated degrees of freedom (edf), reference degrees of freedom (Ref.df), F statistics, and approximate P values. Panel c reports overall model fit statistics.

a, Parametric coefficients

| **Model** | **Term** | **Estimate** | **Std_Error** | **Statistic** | **P_value** |
| --- | --- | --- | --- | --- | --- |
| m0 | (Intercept) | 1.583 | 0.01577 | 100.4 | < 1E-16 |
| m1 | (Intercept) | 1.572 | 0.01636 | 96.07 | < 1E-16 |
| m1 | Invasion_state (invaded) | 0.1559 | 0.06064 | 2.572 | 1.023e-02 |
| m2 | (Intercept) | 1.572 | 0.01635 | 96.15 | < 1E-16 |
| m2 | Invasion_state (invaded) | 0.1753 | 0.06192 | 2.83 | 4.721e-03 |

b, Smooth-term significance

| **Model** | **Term** | **edf** | **Ref_df** | **F** | **P_value** |
| --- | --- | --- | --- | --- | --- |
| m0 | s(Diversity) | 3.409 | 3.816 | 6.666 | 3.541e-05 |
| m1 | s(Diversity) | 3.418 | 3.821 | 6.431 | 4.944e-05 |
| m2 | s(Diversity):Invasion_state (non-invaded) | 3.24 | 3.713 | 5.874 | 1.769e-04 |
| m2 | s(Diversity):Invasion_state (invaded) | 2.807 | 3.288 | 1.837 | 1.213e-01 |

c, Model fit summary

| **Model** | **Adj_R2** | **Deviance_explained** | **REML** | **Scale** | **n** |
| --- | --- | --- | --- | --- | --- |
| m0 | 0.01829 | 0.02073 | 1221 | 0.3419 | 1374 |
| m1 | 0.02233 | 0.02547 | 1219 | 0.3404 | 1374 |
| m2 | 0.02366 | 0.02867 | 1221 | 0.34 | 1374 |

# Supplementary Table.29 Northern Baltic Drainages-specific model comparisons for invasion-intensity GAMs within invaded communities.

Generalized additive models (GAMs) fitted to invaded communities only within the Northern Baltic Drainages ecoregion, testing whether invasion intensity modifies biodiversity–stability relationships. Models correspond to those defined in the Methods: m5, diversity only; m6, additive smooths of diversity and invasion intensity; and m7, additive smooths plus a diversity × invasion-intensity interaction surface. Panel a reports overall model fit statistics, including Akaike’s Information Criterion (AIC), ΔAIC relative to the best-supported model in this table, residual degrees of freedom, and residual deviance. Panel b reports likelihood-ratio tests for sequential comparisons between nested models. ΔAIC values are calculated relative to the best-supported model within this table (ΔAIC = AIC_model − AIC_min). These comparisons test whether invasion intensity explains additional variation in temporal community stability and whether invasion intensity reshapes the biodiversity–stability relationship within this ecoregion.

a, Model fit statistics

| **Model** | **Formula** | **df** | **AIC** | Δ**AIC** | **Resid_df** | **Resid_dev** |
| --- | --- | --- | --- | --- | --- | --- |
| m5 | Stability ~ s(Diversity) | 5.3128 | 189.1768 | 0 | 97.2035 | 34.6423 |
| m6 | Stability ~ s(Diversity) + s(Invasion_gradient) | 6.7731 | 191.4241 | 2.2473 | 95.9544 | 34.4122 |
| m7 | Stability ~ s(Diversity) + s(Invasion_gradient) + te(Diversity, Invasion_gradient,) | 8.9093 | 194.0823 | 4.9056 | 94.294 | 33.8666 |

b, Sequential model comparisons

| **Comparison** | **Df_diff** | **Dev_diff** | **P_value** |
| --- | --- | --- | --- |
| m5 vs m6 | 1.671 | 0.2301 | 6.451e-01 |
| m6 vs m7 | 2.612 | 0.5456 | 6.054e-01 |

# Supplementary Table.30 Northern Baltic Drainages-specific model outputs for invasion-intensity GAMs within invaded communities.

Generalized additive models (GAMs) fitted to invaded communities only within the Northern Baltic Drainages ecoregion, testing whether and how invasion intensity influences biodiversity–stability relationships. Models correspond to those defined in the Methods: m5, diversity only; m6, additive smooths of diversity and invasion intensity; and m7, additive smooths plus a diversity × invasion-intensity interaction surface. Panel a reports parametric coefficients for linear terms. Panel b reports the significance of smooth terms, including estimated degrees of freedom (edf), reference degrees of freedom (Ref.df), F statistics, and approximate P values. Panel c reports overall model fit statistics. In the interaction model, the tensor-product smooth te(Diversity, Invasion intensity) captures whether the effect of biodiversity on temporal community stability changes across the invasion gradient within this ecoregion.

a, Parametric coefficients

| **Model** | **Term** | **Estimate** | **Std_Error** | **Statistic** | **P_value** |
| --- | --- | --- | --- | --- | --- |
| m5 | (Intercept) | 1.736 | 0.0594 | 29.22 | < 1E-16 |
| m6 | (Intercept) | 1.736 | 0.05959 | 29.13 | < 1E-16 |
| m7 | (Intercept) | 1.736 | 0.05963 | 29.11 | < 1E-16 |

b, Smooth-term significance

| **Model** | **Term** | **edf** | **Ref_df** | **F** | **P_value** |
| --- | --- | --- | --- | --- | --- |
| m5 | s(Diversity) | 2.797 | 3.313 | 1.576 | 1.671e-01 |
| m6 | s(Diversity) | 2.785 | 3.296 | 1.499 | 1.858e-01 |
| m6 | s(Invasion_gradient) | 1.261 | 1.477 | 0.07269 | 8.643e-01 |
| m7 | s(Diversity) | 1.001 | 1.001 | 0.15 | 6.998e-01 |
| m7 | s(Invasion_gradient) | 1.455 | 1.742 | 0.4099 | 7.159e-01 |
| m7 | te(Diversity,Invasion_gradient) | 3.25 | 4.166 | 1.075 | 3.912e-01 |

c, Model fit summary

| **Model** | **Adj_R2** | **Deviance_explained** | **REML** | **Scale** | **n** |
| --- | --- | --- | --- | --- | --- |
| m5 | 0.04486 | 0.07157 | 95.87 | 0.3564 | 101 |
| m6 | 0.03885 | 0.07774 | 97.67 | 0.3586 | 101 |
| m7 | 0.03744 | 0.09236 | 95.1 | 0.3592 | 101 |
